# Supplementary material for: Multi-omics analysis of the bioactive constituents biosynthesis of glandular trichome in Perilla frutescens
Source: PubMed Central journal article supplement (PMC8214284; doi:10.1186/s12870-021-03069-4), 2021-06-18
Supplement: 12870_2021_3069_MOESM3_ESM.pdf [file 12870_2021_3069_MOESM3_ESM.pdf]

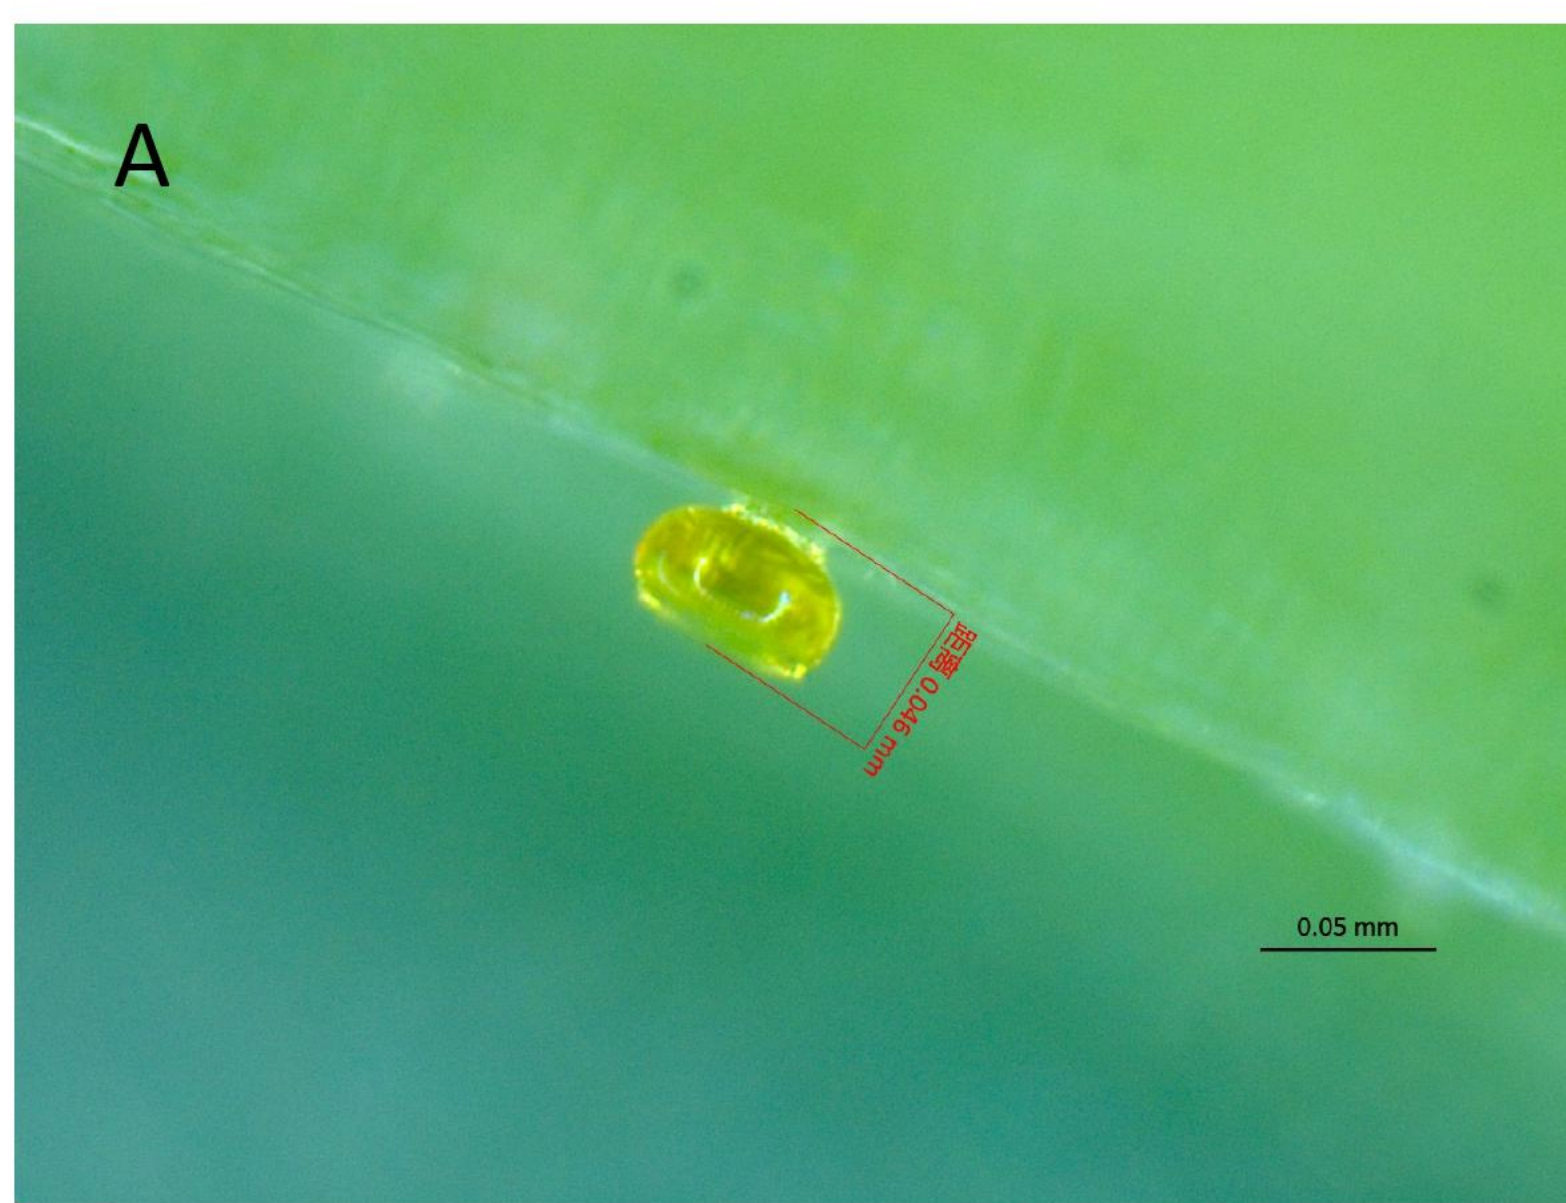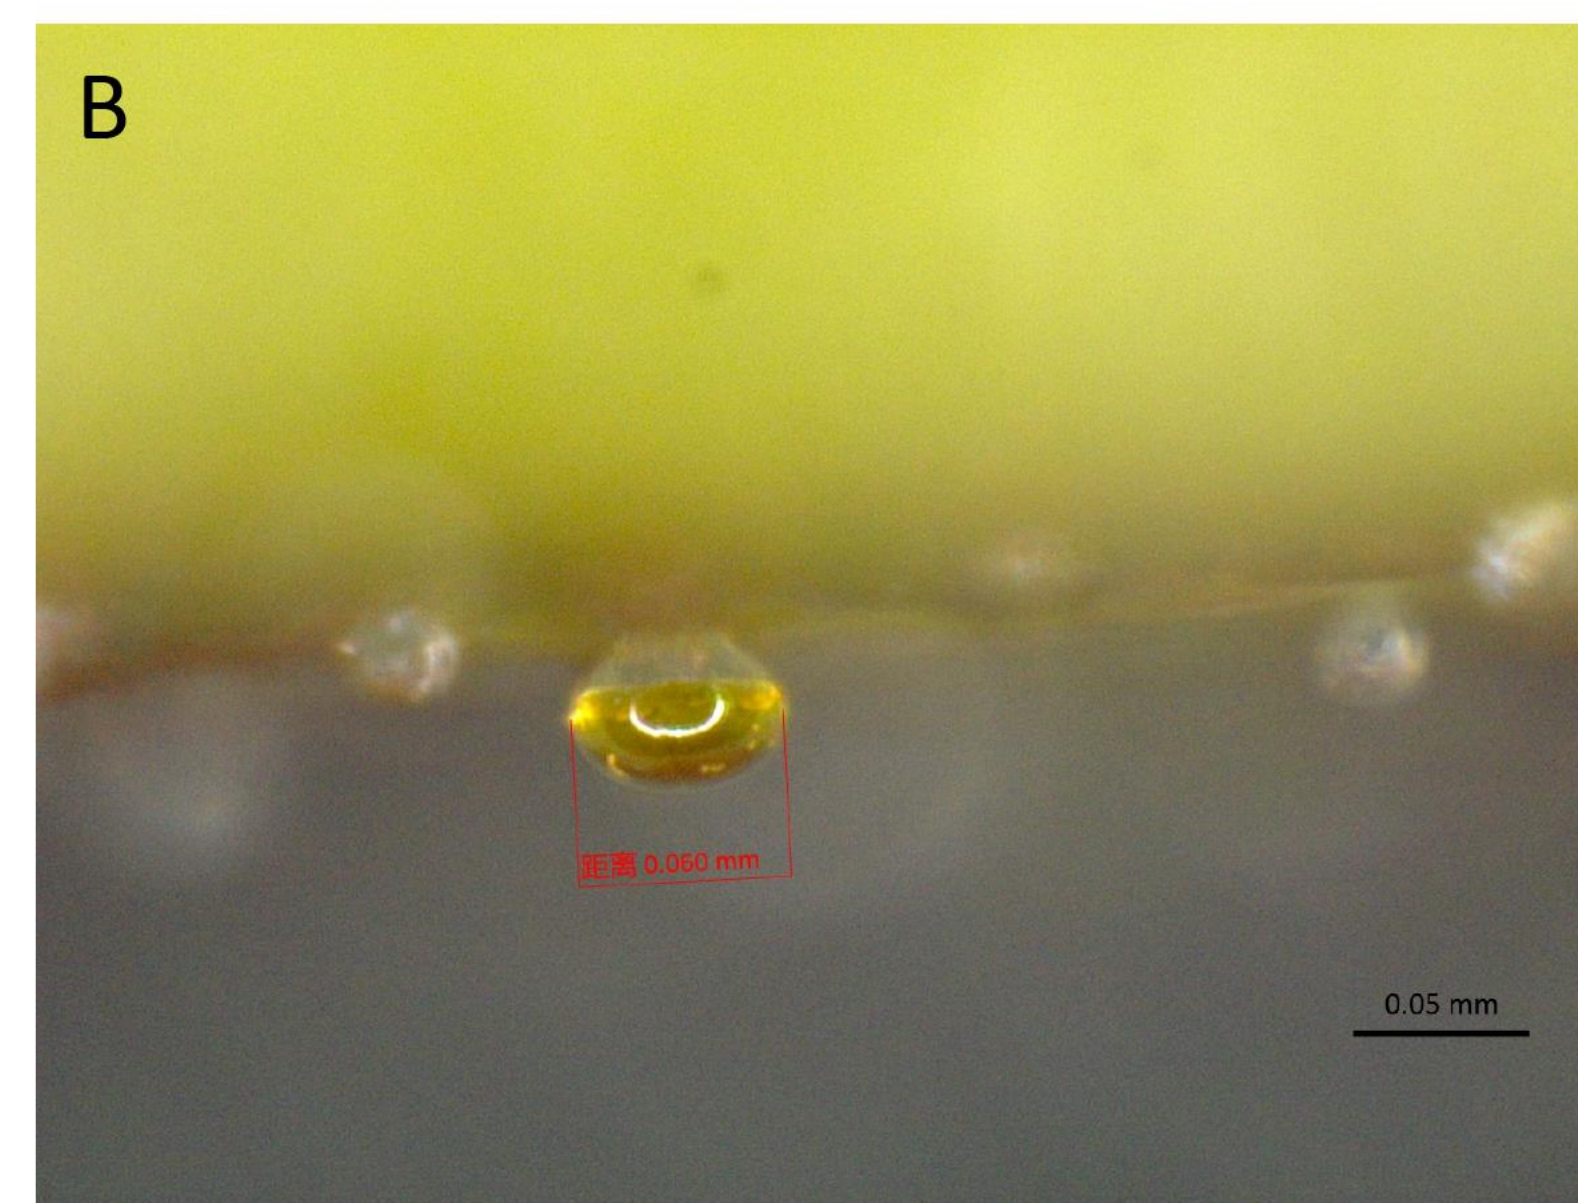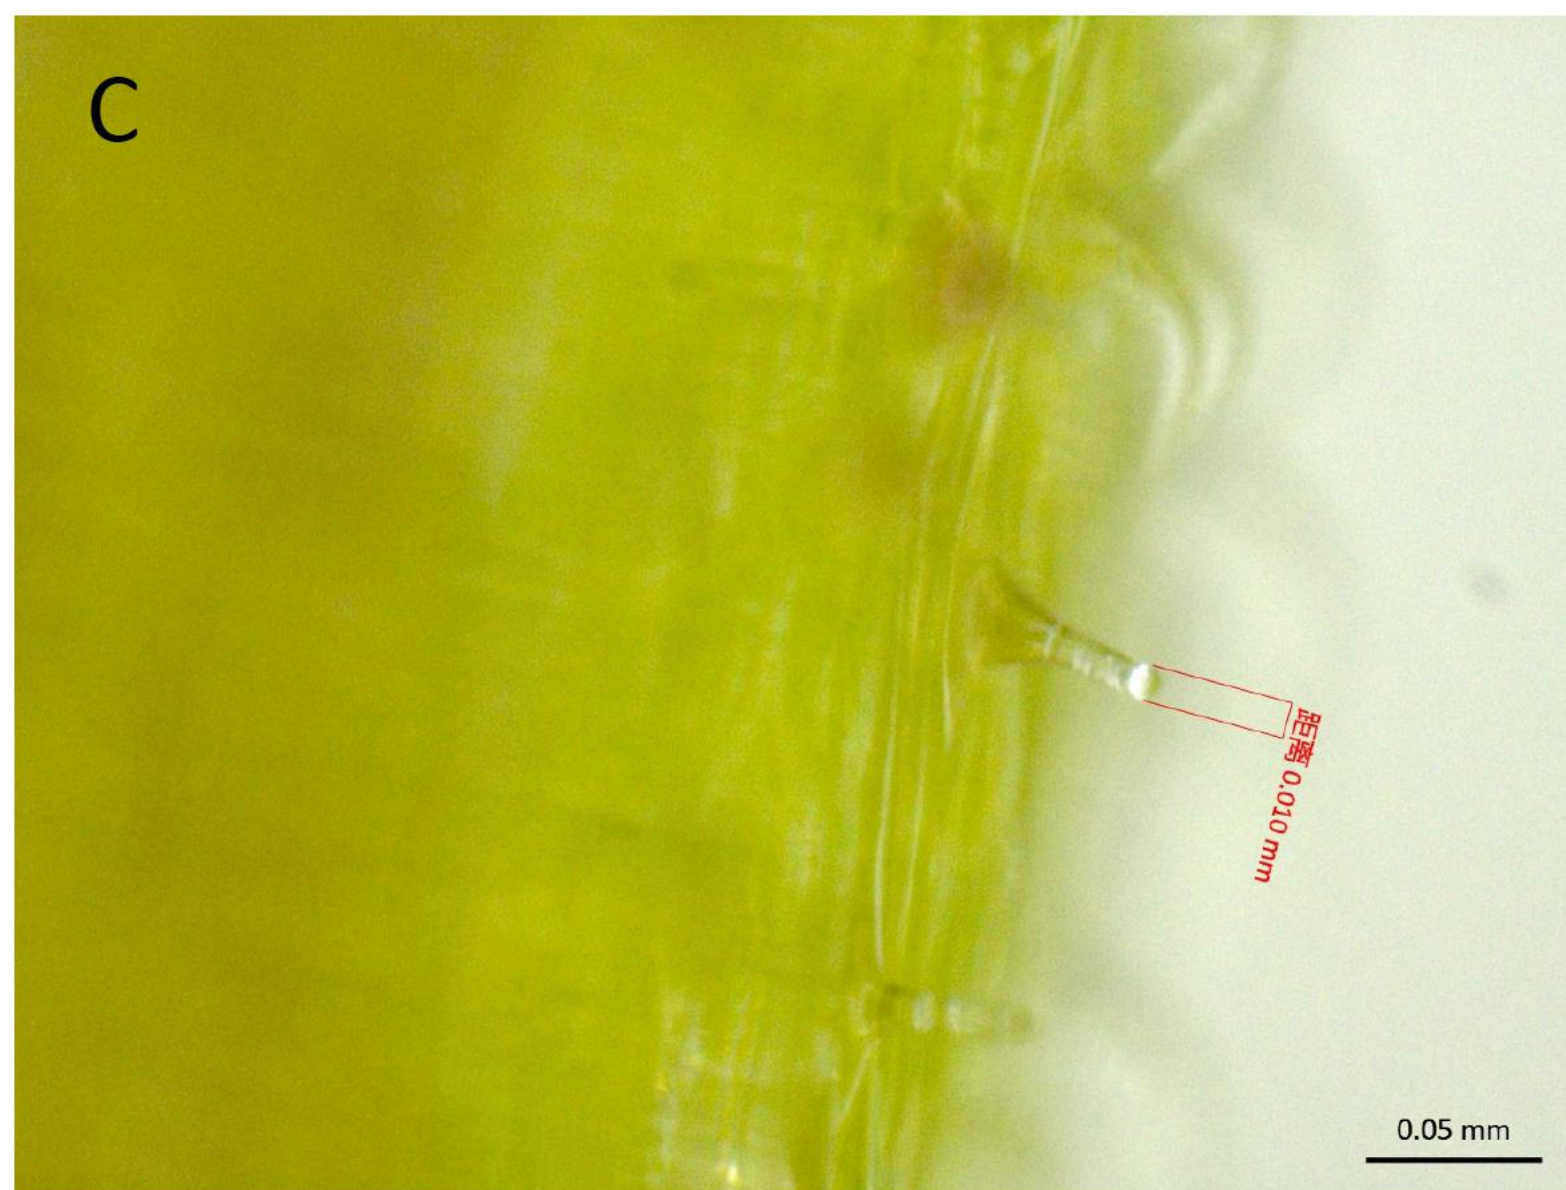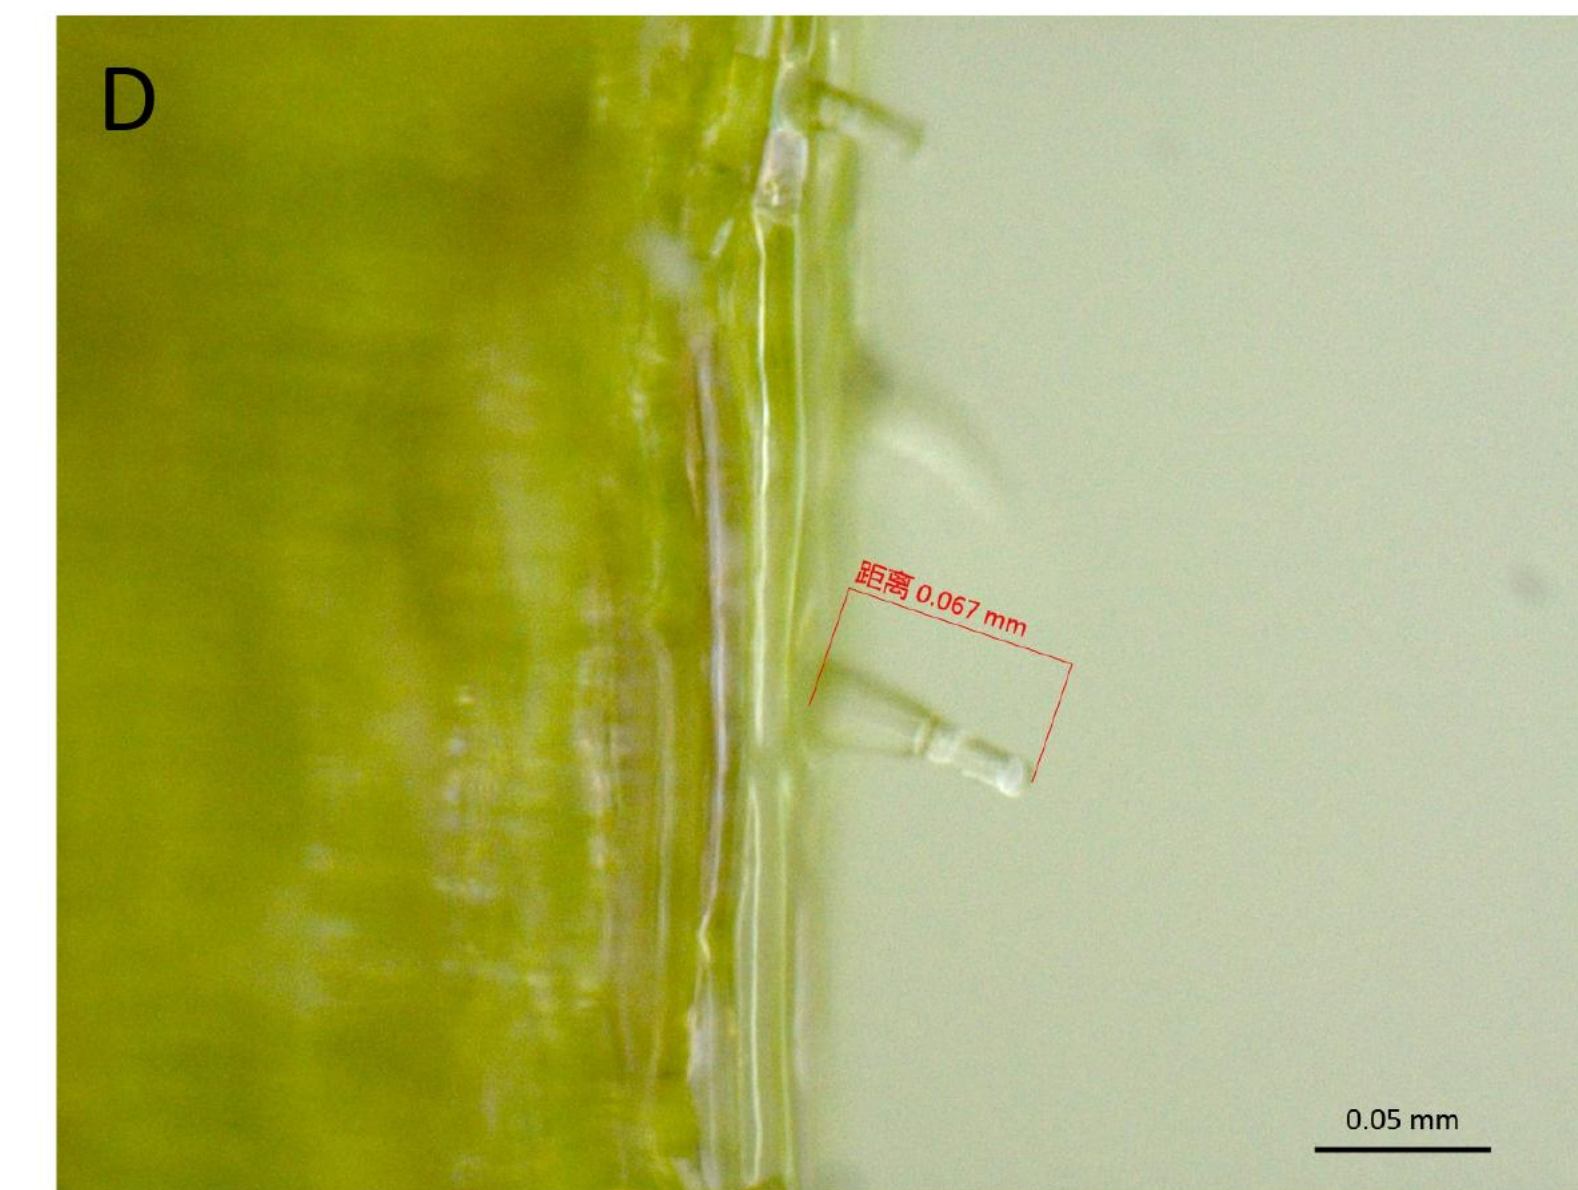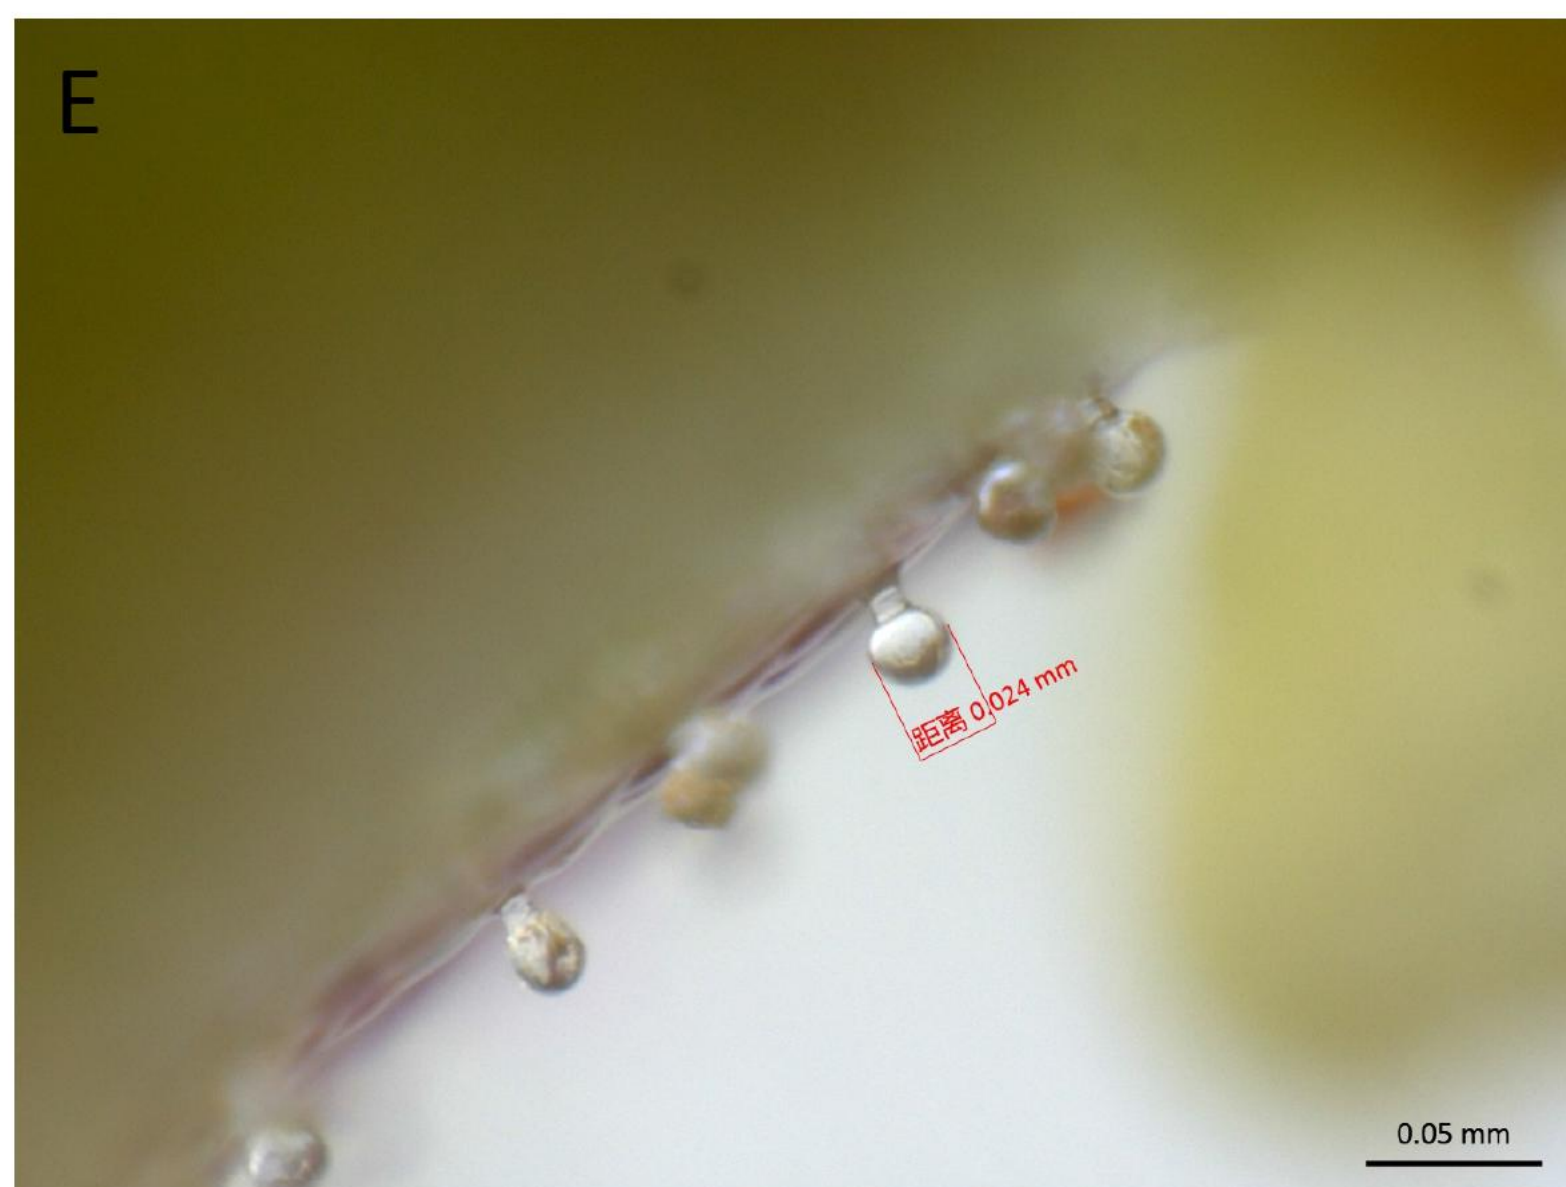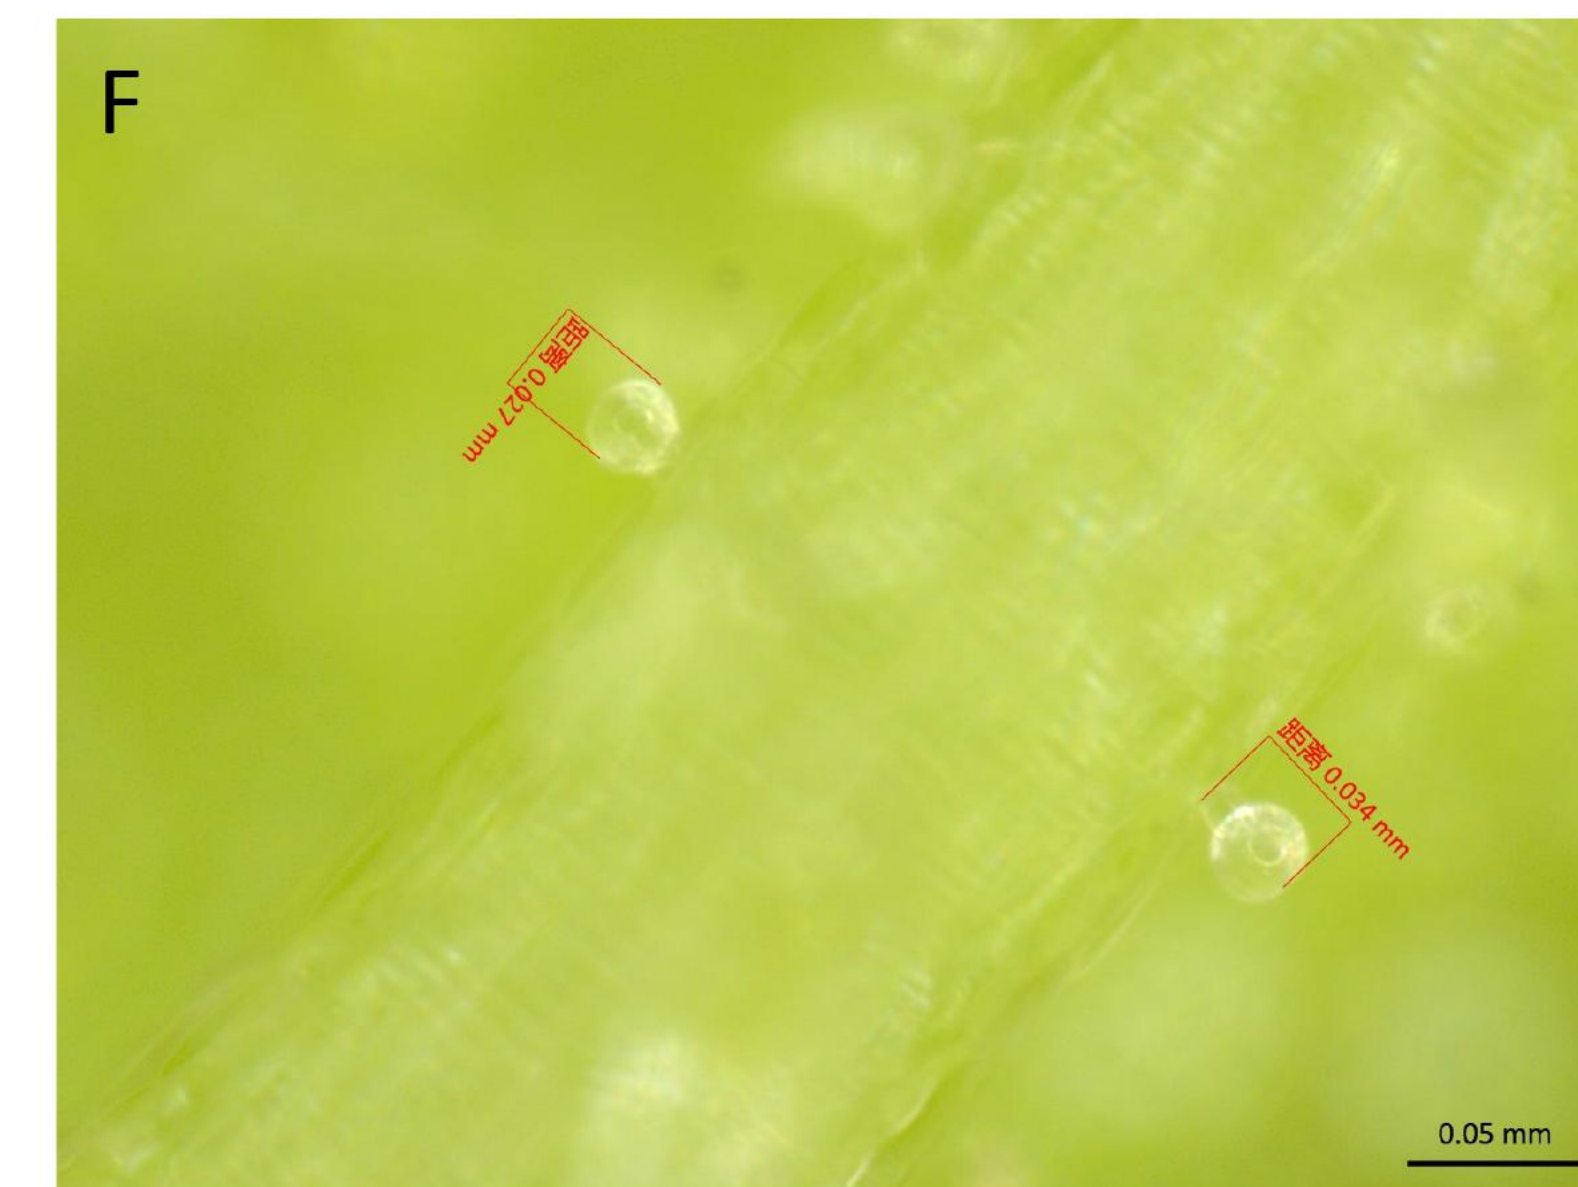

**Supplementary Fig.3. The measurement of glandular trichomes in *P. frutescens* (bar=0.05 mm); A, B for PGTs; C, D for DGTs; E, F for DGTs.**
