# Supplementary material for: Multi-omics analysis of the bioactive constituents biosynthesis of glandular trichome in Perilla frutescens
Source: PubMed Central journal article supplement (PMC8214284; doi:10.1186/s12870-021-03069-4), 2021-06-18
Supplement: 12870_2021_3069_MOESM9_ESM.pdf [file 12870_2021_3069_MOESM9_ESM.pdf]

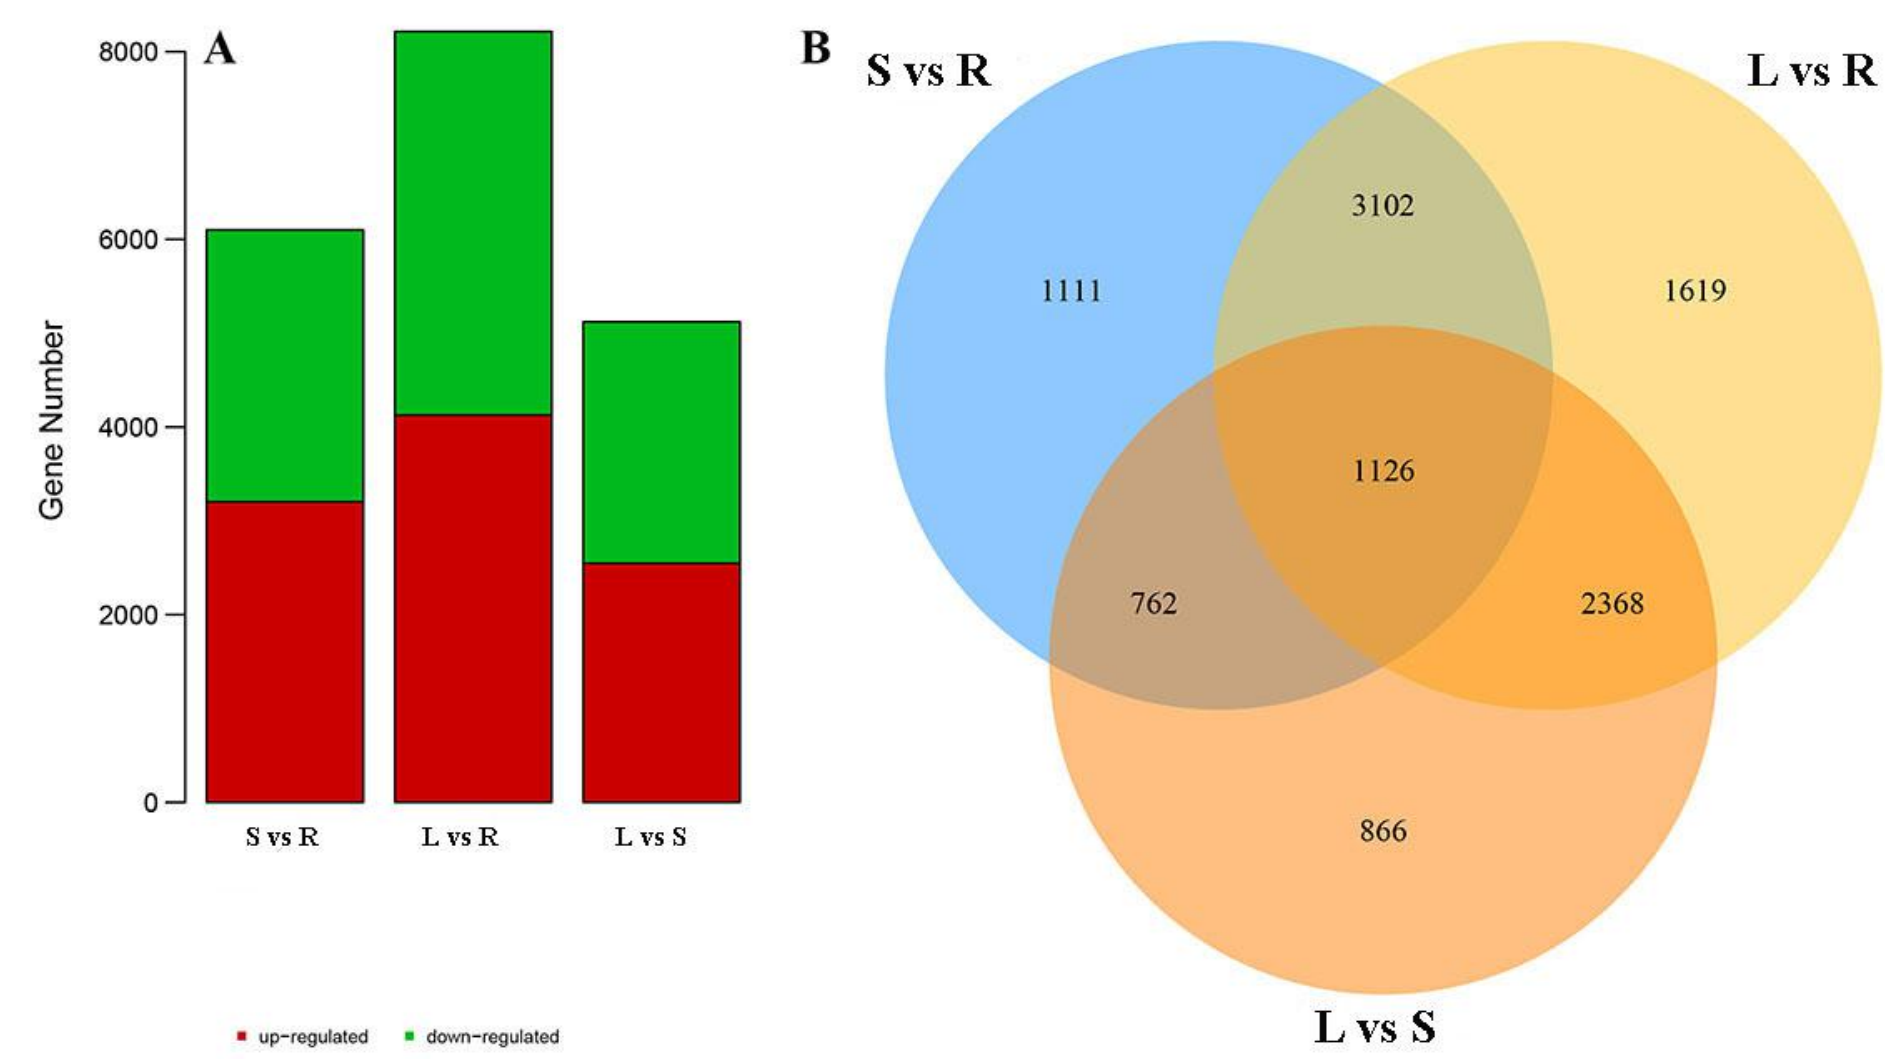

**Supplementary Fig.9. The DEGs barplot (A) and DEGs venn (B) of *P. frutescens*.**
