# Supplementary material for: Multi-omics analysis of the bioactive constituents biosynthesis of glandular trichome in Perilla frutescens
Source: PubMed Central journal article supplement (PMC8214284; doi:10.1186/s12870-021-03069-4), 2021-06-18
Supplement: 12870_2021_3069_MOESM10_ESM.pdf [file 12870_2021_3069_MOESM10_ESM.pdf]

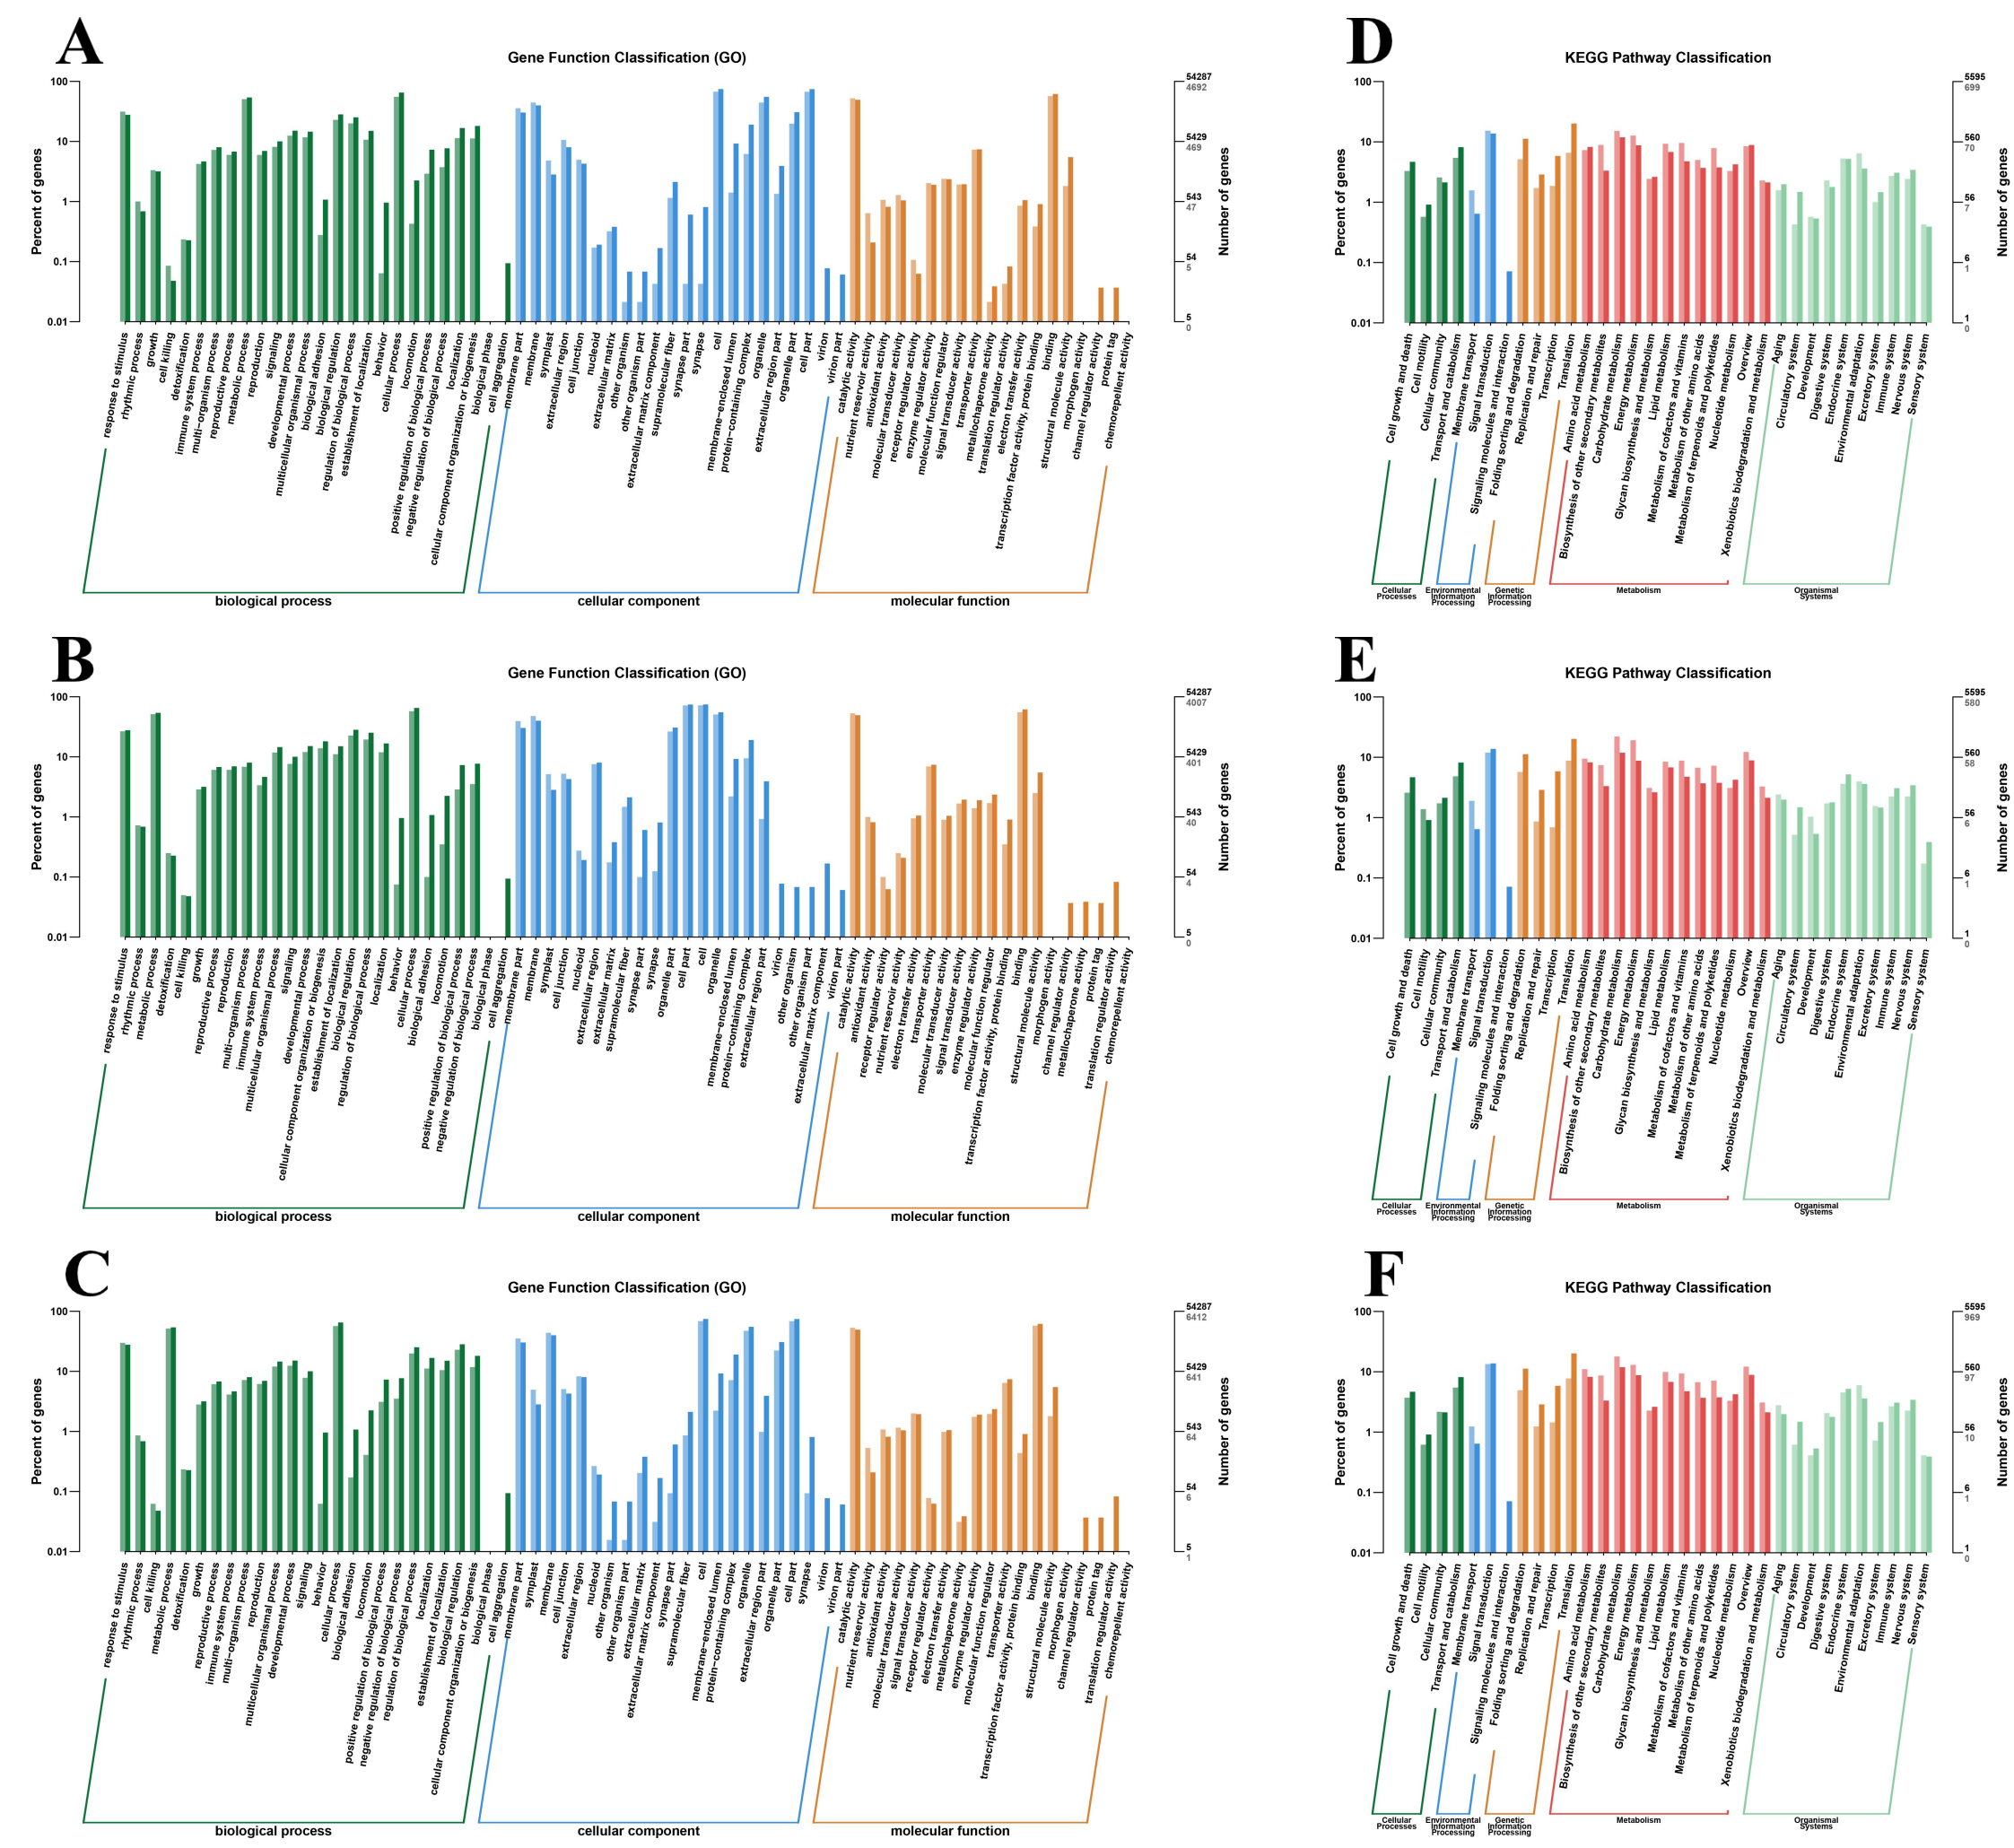

**Supplementary Fig.10. GO classifications and KEGG pathway of S vs R (A, D), L vs S (B,E) and L vs R (C, F).**
