# Supplementary material for: Multi-omics analysis of the bioactive constituents biosynthesis of glandular trichome in Perilla frutescens
Source: PubMed Central journal article supplement (PMC8214284; doi:10.1186/s12870-021-03069-4), 2021-06-18
Supplement: 12870_2021_3069_MOESM15_ESM.pdf [file 12870_2021_3069_MOESM15_ESM.pdf]

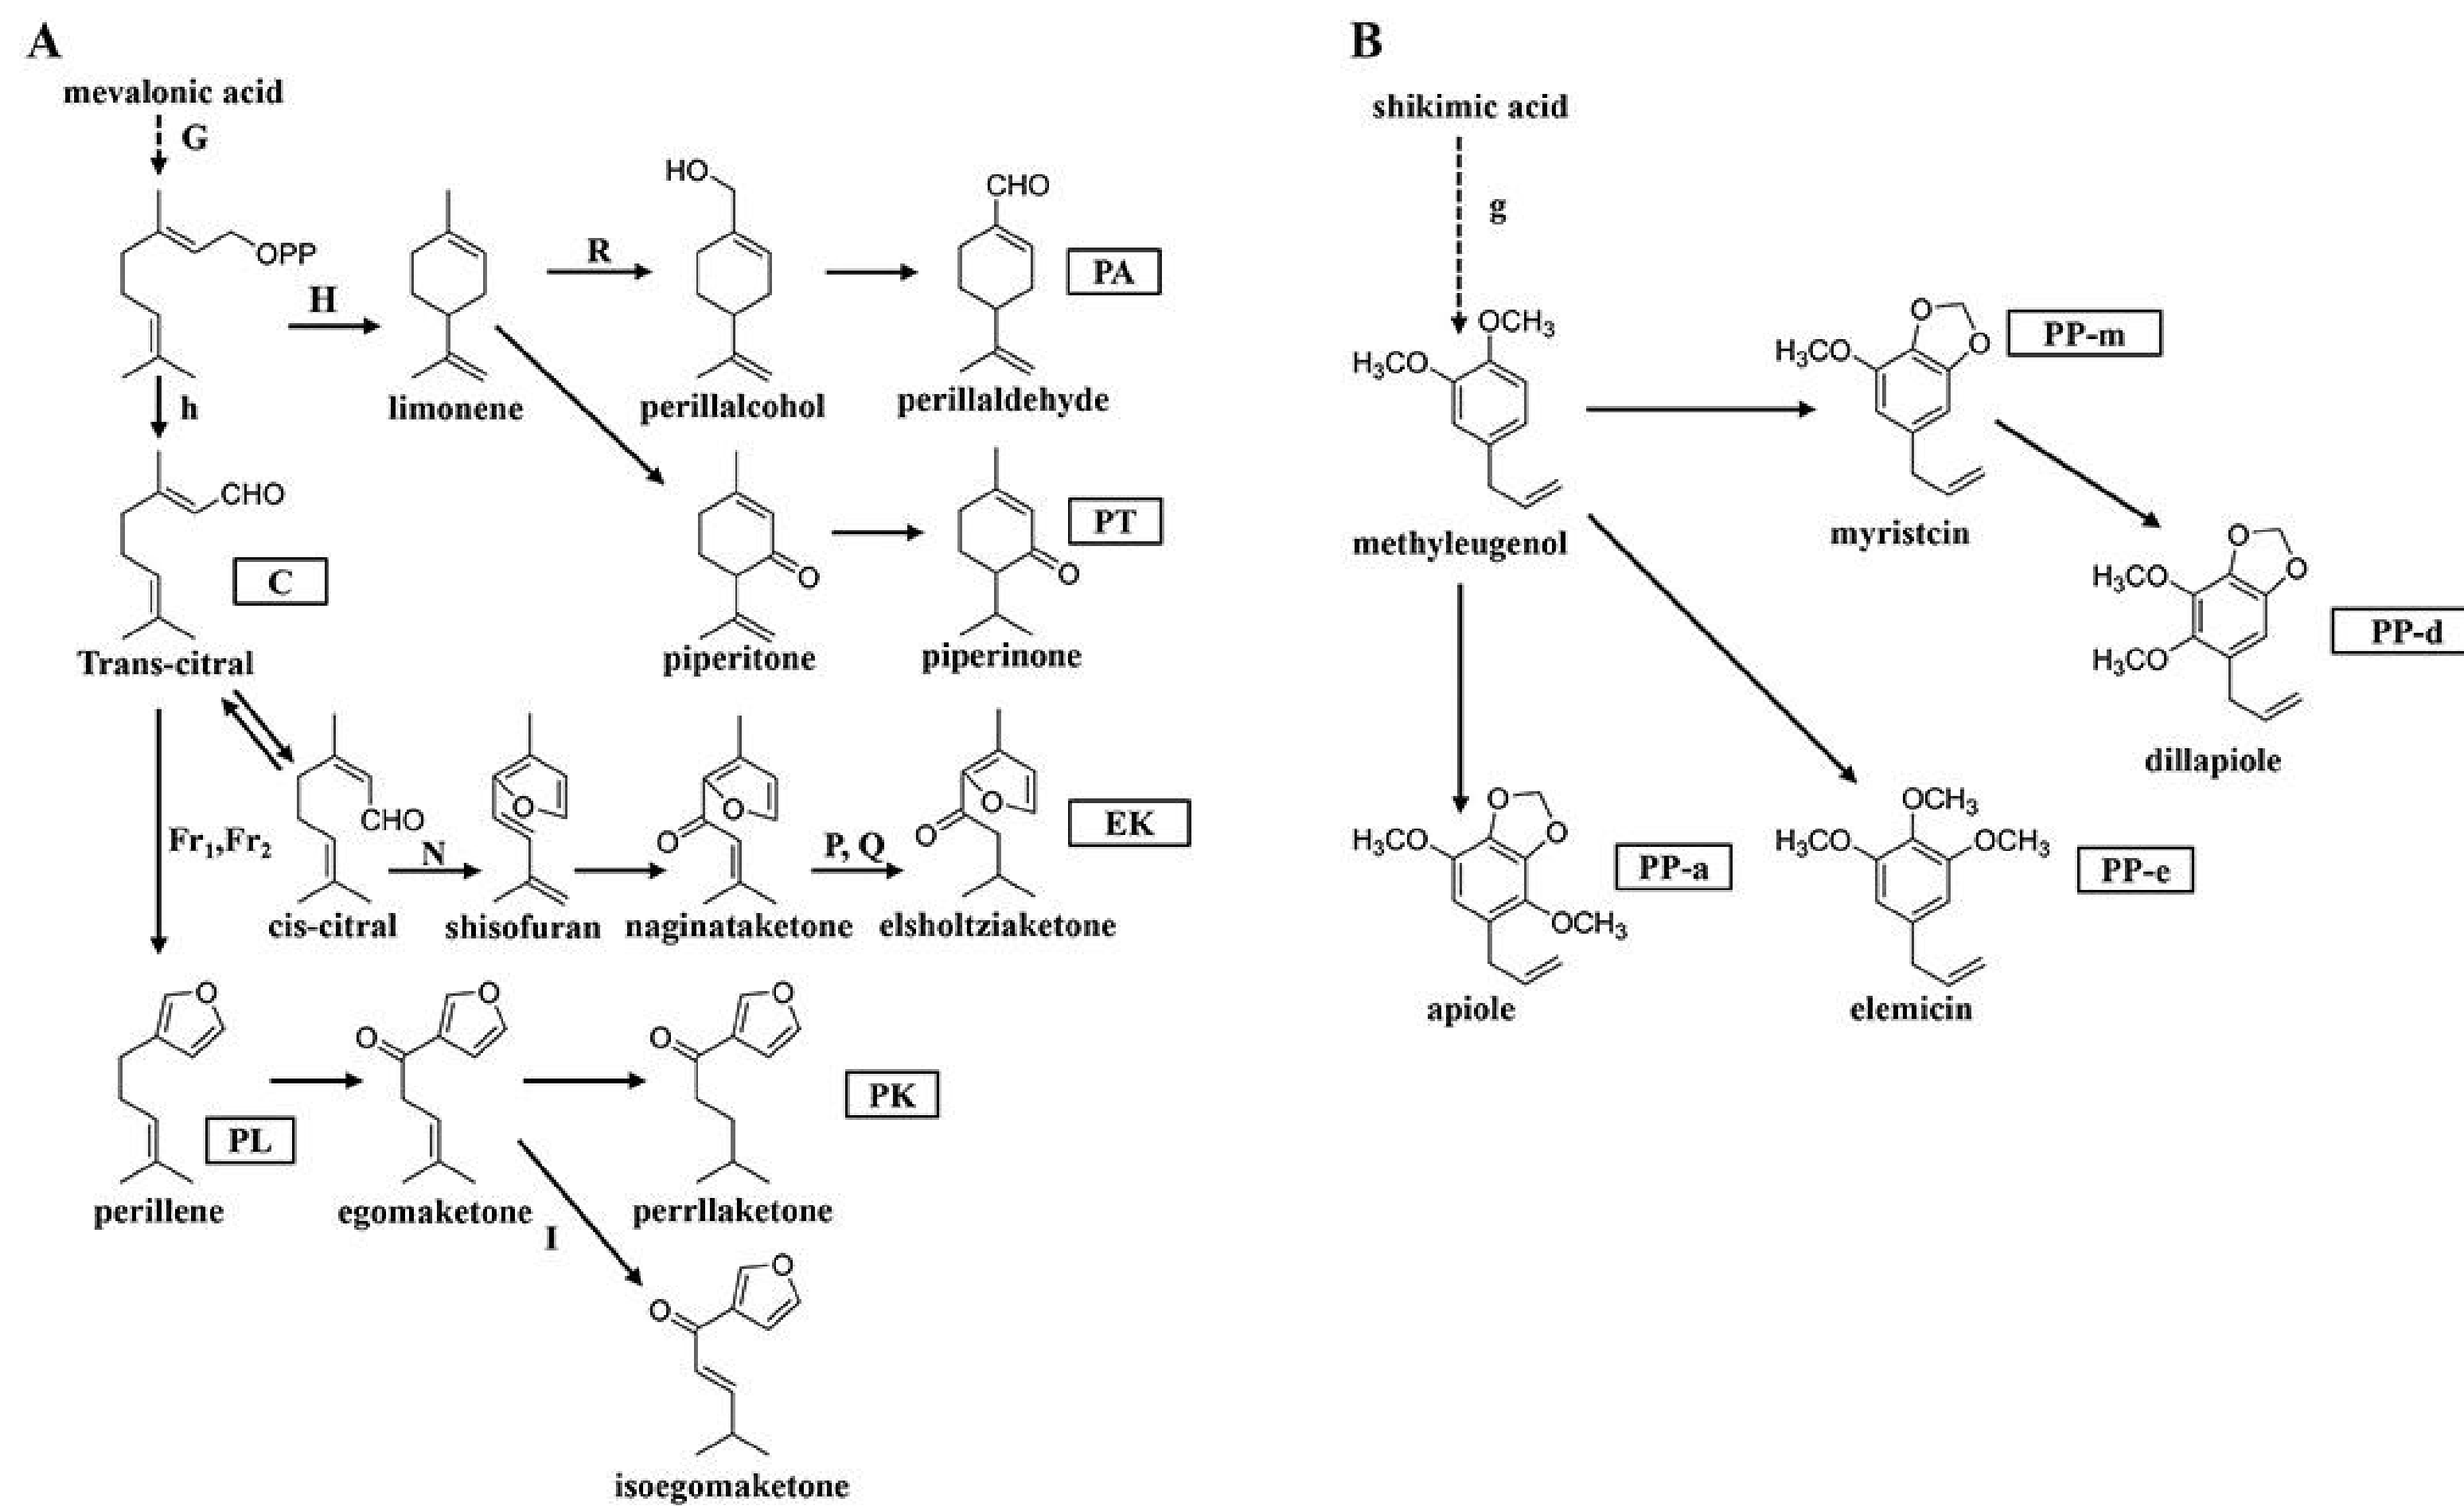

**Supplementary Fig.15. Possible reaction steps controlled by genes in hypothetical biosynthetic pathways of chemotypes of *P. frutescens* (Yuba, Honda, Koezuka & Tabata, 1995).**
